# Supplementary material for: An Assessment of the Impacts of Snowmelt Rate and Continuity Shifts on Streamflow Dynamics in Three Alpine Watersheds in the Western U.S.
Source: MDPI journal article supplement (doi:10.3390/w14071095), 2022-03-30
Supplement: s1 [file s1]

Archive with 1 entries (1 files):
- water-1634362-supplementary.pdf
