# Supplementary material for: An Assessment of the Impacts of Snowmelt Rate and Continuity Shifts on Streamflow Dynamics in Three Alpine Watersheds in the Western U.S.
Source: MDPI journal article supplement (doi:10.3390/w14071095), 2022-03-30
Supplement: s1 [file s1 › water-1634362-supplementary.pdf]

## Supplementary materials

**Table S1.** Information about the three mountain watersheds, USGS gauges and SNOTEL stations used in this study.

| Watershed     | USGS Gauge Number | SNOTEL Station         | Elevation (m) |                | Average Annual Rainfall (mm/y) | Annual Mean Temperature (°C) | Drainage Area (km <sup>2</sup> ) |
|---------------|-------------------|------------------------|---------------|----------------|--------------------------------|------------------------------|----------------------------------|
|               |                   |                        | USGS Gauge    | SNOTEL station |                                |                              |                                  |
| Cleve Creek   | 10243700          | Berry Creek            | 1889.8        | 2773.7         | 765                            | 2.9                          | 82.3                             |
| Twin River    | 10249300          | Big Creek              | 1950.7        | 2651.8         | 712                            | 5.9                          | 51.8                             |
| Incline Creek | 10336700          | Mountain Rose Ski Area | 1904.1        | 2697.5         | 858                            | 7.1                          | 17.5                             |

**Table S2.** Trends of daily mean, minimum and maximum temperature in three watersheds during the 1990-2016 period.

|                   | Cleve Creek | Twin River | Incline Creek |
|-------------------|-------------|------------|---------------|
| $T_{\text{mean}}$ | 0.073**     | 0.085***   | 0.009         |
| $T_{\text{max}}$  | 0.041*      | 0.095***   | -0.013        |
| $T_{\text{min}}$  | 0.103***    | 0.074***   | 0.038*        |

Note: The asterisk \*, \*\* and \*\*\* indicate the statistics are significant at 0.05, 0.01 and 0.001 level, respectively.

**Table S3.** General shifts of streamflow timing metrics with snow metrics during period 1990-2016.

| Indices     | SMR (mm/d) | SP (%)  | SRT     | SSL (d) |
|-------------|------------|---------|---------|---------|
| Cleve Creek | Slope      | Slope   | Slope   | Slope   |
| Q25         | 17.11***   | 2.70**  | 0.81*** | 0.67**  |
| Q50         | 8.42***    | 1.61*** | 0.45*** | 0.36*** |
| PQD         | 5.96**     | 1.86    | 0.28    | 0.38    |
| PQ          | 1.56***    | 0.18*   | 0.06*   | 0.04    |
| ASF         | 38.53***   | 7.77*** | 1.63**  | 1.17*   |
| SBF         | 11.10***   | 2.47*** | 0.53*** | 0.42**  |
| Twin River  |            |         |         |         |
| Q25         | 22.78***   | 3.03*** | 0.65*** | 0.63*** |
| Q50         | 11.60***   | 1.58*** | 0.41*** | 0.30**  |
| PQD         | 6.34       | 1.05    | 0.24    | 0.18    |
| PQ          | 1.02***    | 0.14*** | 0.02*   | 0.03*** |
| ASF         | 38.99***   | 5.14*** | 0.74*   | 1.09*** |
| SBF         | 8.19***    | 1.10*** | 0.20**  | 0.21*** |

|               |           |          |         |         |
|---------------|-----------|----------|---------|---------|
| Incline Creek |           |          |         |         |
| Q25           | 16.78***  | 3.08**   | 1.01*** | 0.72**  |
| Q50           | 6.94***   | 1.85***  | 0.49*** | 0.43*** |
| PQD           | 5.36      | 2.42***  | 0.46    | 0.51**  |
| PQ            | 1.73***   | 0.34***  | 0.08*** | 0.07*** |
| ASF           | 101.81*** | 19.83*** | 4.61*** | 4.40*** |
| SBF           | 17.48***  | 4.08***  | 0.94*** | 0.90*** |

Note: The asterisk \*, \*\* and \*\*\* indicate the statistics are significant at 0.05, 0.01 and 0.001 level, respectively.

**Table S4.** Average, minimum and maximum value of the snow and streamflow metrics during period 1990-2016.

|            | Cleve Creek          | Twin River           | Incline Creek          |
|------------|----------------------|----------------------|------------------------|
| SMR (mm/d) | 3.22 [1.54,5.71]     | 2.78 [1.55,4.4]      | 3.82 [1.4,6.33]        |
| SP         | 0.68 [0.6,0.76]      | 0.64 [0.55,0.76]     | 0.59 [0.49,0.7]        |
| SRT        | 79.11 [46.42,105.66] | 62.46 [21.36,90.44]  | 99.09 [49.56,135.29]   |
| SSL (d)    | 232.77 [207,273]     | 220.23 [168,262]     | 202.12 [152,248]       |
| Q25        | 195.96 [120,233]     | 194.85 [149,227]     | 172.27 [65,226]        |
| Q50        | 233.38 [210,256]     | 230 [211,251]        | 223.5 [191,257]        |
| PQD        | 231.31 [210,256]     | 232.92 [205,258]     | 223.96 [171,268]       |
| PQ (mm)    | 1.43 [0.4,10]        | 1.07 [0.22,3.32]     | 3.7 [0.6,10.04]        |
| ASF (mm)   | 116.4 [61.73,224.75] | 68.62 [24.86,140.75] | 334.29 [104.77,660.77] |
| SBF (mm)   | 27.3 [13.93,59.69]   | 12.38 [3.54,31.21]   | 63.57 [15.86,118.74]   |

Note: The value in the table is displayed as the “average [minimum, maximum]”.

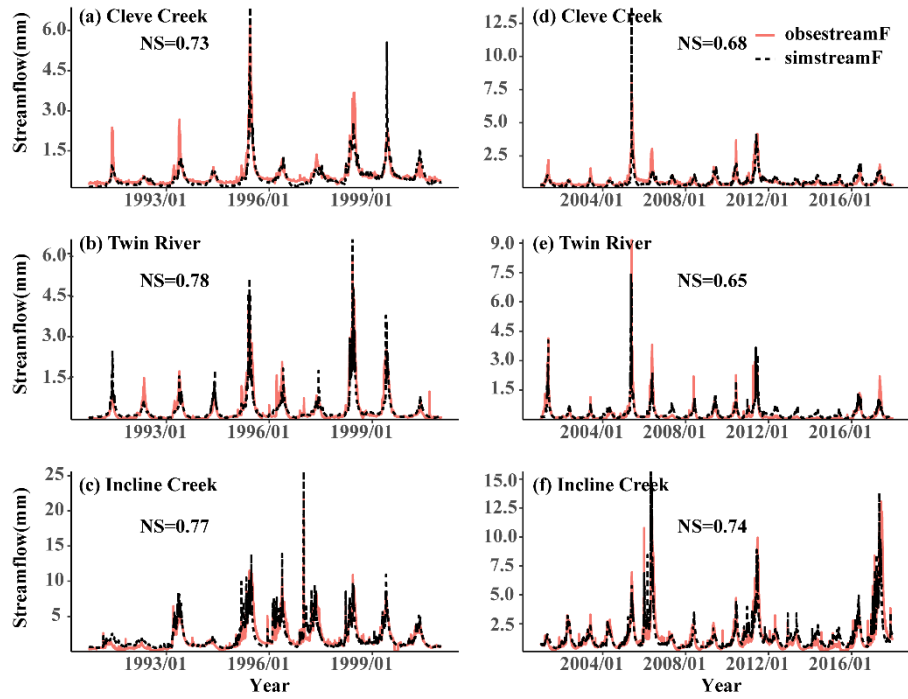

**Figure S1.** Calibration (for 1990-2000 period) and evaluation (for 2001-2016 period) of observed daily streamflow (red line) and simulated streamflow (black dotted line) in the three watersheds. (a-c) for calibration periods; (d-f) for evaluation periods; and NS is Nash-Sutcliffe coefficient. All the NS results are greater than 0.73 in calibration periods, and greater than 0.65 in evaluation periods, expressing that applying CHES model to simulate streamflow is reliable.

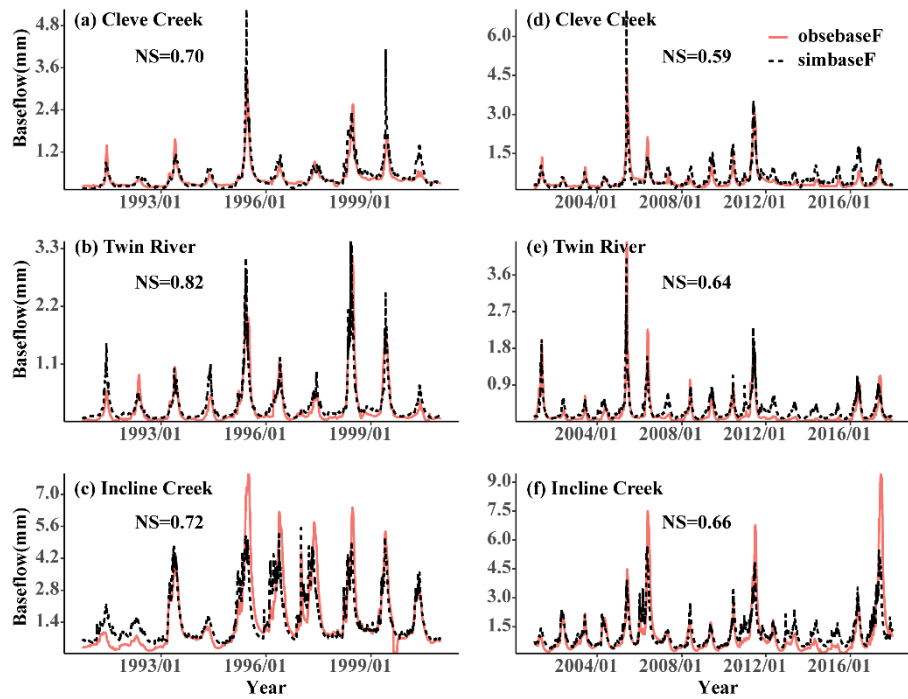

**Figure S2.** Calibration (for 1990-2000 period) and evaluation (for 2001-2016 period) of observed daily baseflow (red line) and simulated baseflow (black dotted line) in the three watersheds. (a) and (d) for Cleve Creek; (b) and (e) for Twin River; (c) and (f) for Incline Creek; and NS is Nash-Sutcliffe coefficient.

Similarly, all the NS results are greater than 0.70 in calibration periods, and greater than 0.59 in evaluation periods, expressing that applying CHES model to simulate base flow is reliable.

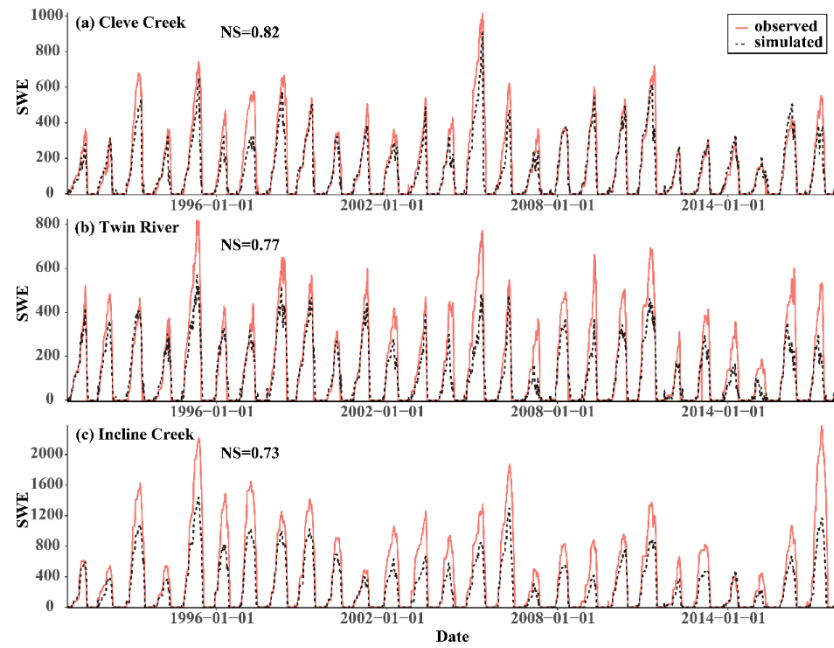

**Figure S3.** Observed daily SWE (red line) and simulated SWE (black dotted line) in the three watersheds. (a) for Cleve Creek; (b) for Twin River; (c) for Incline Creek; and NS is Nash-Sutcliff coefficient. The NS results are all greater than 0.73 in three watersheds, showing that the simulation results of SWE are investigable.

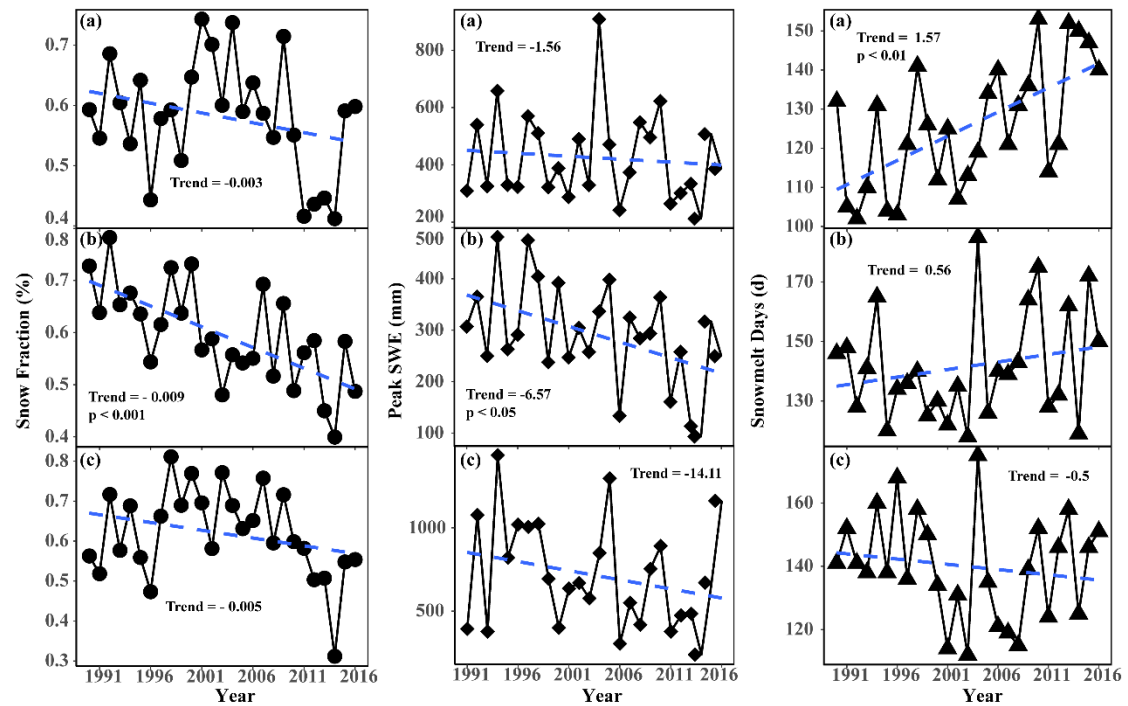

**Figure S4.** Trends of snow fraction, peak SWE and snowmelt days in the (a) Cleve Creek, (b) Twin River and (c) Incline Creek during 1990-2016.

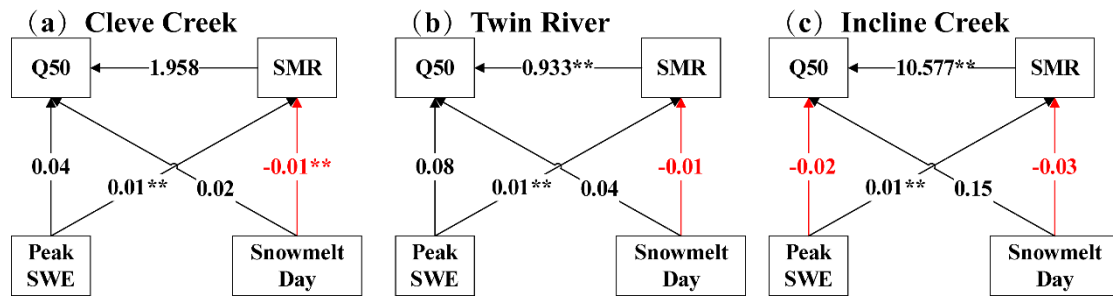

**Figure S5.** Structural equation model examining the multivariate effects on Q50. Black arrows and red arrows represent positive and negative effects, respectively. The asterisk symbols \*, \*\* indicate that effects are significant at 0.01, 0.05 levels, respectively.

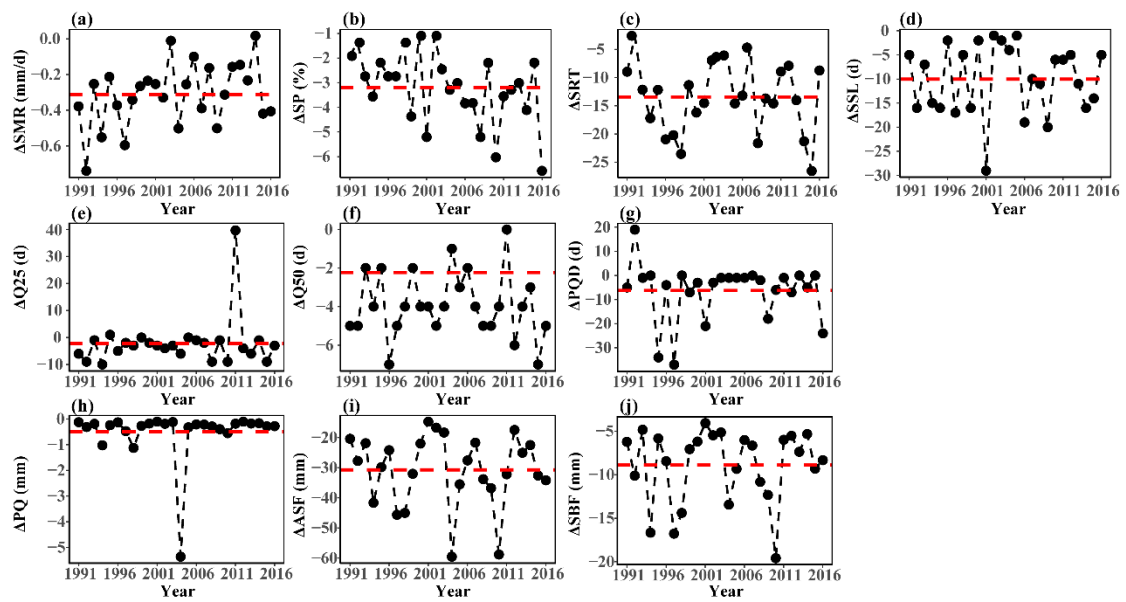

**Figure S6.** Differences in metrics between simulation under warming scenario with daily minimum and maximum temperature increasing by 1°C increase and that under the reference scenario in the Cleve Creek watershed during 1990 to 2016. Red line represents a multi-year average difference.
